# Supplementary material
Source: MDPI journal article supplement (https://www.mdpi.com/2076-3271/8/2/21)
Supplement: s1 [file s1]

## Supplementary Material

**Table 1.** List of Primers used in this study.

|                     | Forward                     | Reverse                                   |
|---------------------|-----------------------------|-------------------------------------------|
| ANP                 | ATG GGC TCC TTC TCC ATC AC  | TCT TCG GTA CCG GAA GCT G                 |
| Troponin T<br>(TnT) | AGG AGA ACA GGA GGA AGG CT  | CTG GAT GTA CCC TCC AAA ATG C             |
| $\alpha$ MHC        | CAC CCT GGA GGA CCA GAT TA  | TGG ATC CTG ATG AAC TTC CC                |
| $\beta$ MHC         | GAA GGA GGA CCA GGT GAT G   | AGG TGT AGA TCA TCC AGG AAG               |
| $\beta$ Actin       | GAA GTG TGA CGT             | TGA CAT CCGTGC TGA TCC ACA TCT GCT<br>GGA |
| LMP-2               | CTT TGC AAT CGG TGG TTC CG  | CGG TTC ATG GCC AGA GTG AT                |
| SDF-1 $\alpha$      | CCA AGG TCG TCG CCG TGC TG  | GGC TCT GGC GAC ATG GCT CT                |
| CXCR4               | GCC ATG GCT GAC TGG TAC TT  | CAC CCA CAT AGA CGG CCT TT                |
| Bax                 | ACT AAA GTG CCC GAG CTG ATC | CAC TGT CTG CCA TGT GGG G                 |
| B2M                 | GCC GTC GTG CTT GCC ATT C   | CTG AGG TGG GTG GAA CTG AGA C             |

**Table 2.** List of primary antibodies used in this study (all: mouse monoclonal IgG).

|       |                                   |            |
|-------|-----------------------------------|------------|
| LMP-2 | LMP2 (G-3) sc-373996              | Santa Cruz |
| GAPDH | Anti-GAPDH Mouse mAb (&C5)        | Calbiochem |
| MHC   | Heavy Chain Cardiac Myosin (ab15) | abcam      |
| Actin | MaB to cardiac Actin (Ac1-20.4.2) | ProGen     |

**Video:** The video shows the time-dependent cell rounding of initial rod-shaped cells.
